# Supplementary material
Source: publisher figshare collection journal article supplement (https://acs.figshare.com/ndownloader/files/4095637)
Supplement: Supplementary file 1 [file 4095637]

## Supporting Information

### Thermodynamic Properties of a New Hydrophobic Amide-based Task-Specific Ionic Liquid [EimCH<sub>2</sub>CONHBu][NTf<sub>2</sub>]

Qing-Shan Liu<sup>†, ‡</sup>, Zhuo Li<sup>§</sup>, Urs Welz-Biermann<sup>‡</sup>, Chang-Ping Li<sup>\*, ||</sup>, Xiao-Xia Liu<sup>\*</sup>,  
<sup>†</sup>

<sup>†</sup> Department of Chemistry, Northeastern University, Shenyang 110819, China

<sup>‡</sup> China Ionic Liquid Laboratory, Dalian Institute of Chemical Physics, Chinese Academy of Sciences, Dalian 116023, China

<sup>§</sup> School of Science, Dalian Ocean University, 116023, Dalian, P.R. China

<sup>||</sup> Department of Chemical Engineering, Dalian University, 116622, Dalian, P.R. China

\* Corresponding authors. E-mail: [changpingli@dicp.ac.cn](mailto:changpingli@dicp.ac.cn) (Chang-Ping Li)  
[xxliu@mail.neu.edu.cn](mailto:xxliu@mail.neu.edu.cn) (X.-X. Liu)

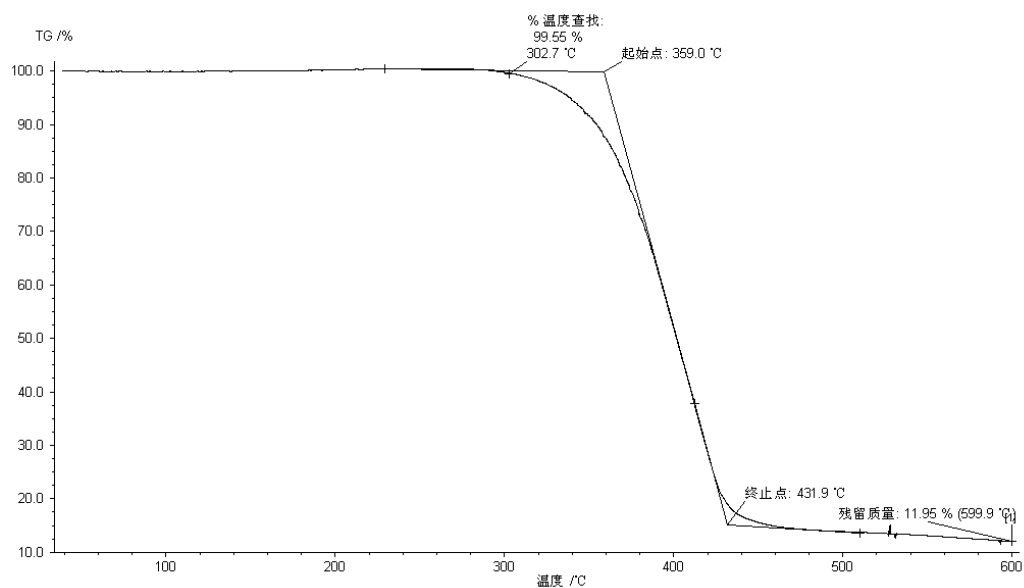

Figure S1: The TG Curve of the [EimCH<sub>2</sub>CONHBu][NTf<sub>2</sub>]

**Table S1.** The mass loss of the [EimCH<sub>2</sub>CONHBu][NTf<sub>2</sub>] following the temperature recorded by TG.

| $100 \delta_m/m$ | $T/K$ | $100 \delta_m/m$ | $T/K$ |
|------------------|-------|------------------|-------|
| 2                | 594   | 20               | 645   |
| 5                | 612   | 50               | 674   |
| 10               | 627   | 80               | 703   |
